# Supplementary material for: Enhanced electrocatalytic dechlorination of 2,4-dichlorophenoxyacetic acid on in situ prepared Pd-anchored Ni(OH)2 bifunctional electrodes: synergistic effect between H* formation on Ni(OH)2 and dechlorination steps on Pd
Source: Royal Society of Chemistry journal article supplement (doi:10.1039/c9cy01359h), 2019-01-01
Supplement: c9cy01359h1.pdf [file c9cy01359h1.pdf]

## Supporting Information

### **Enhanced Electrocatalytic Dechlorination of 2,4-Dichlorophenoxyacetic Acid on In-situ Prepared Pd-anchored Ni(OH)<sub>2</sub> Bifunctional Electrode: Synergistic Effect between H<sup>\*</sup> Formation on Ni(OH)<sub>2</sub> and Dechlorination Steps on Pd**

**Shuang Song<sup>1,2</sup>, Qiuxiang Liu<sup>1,2</sup>, Jinhui Fang<sup>1</sup>, Weiting Yu<sup>1,\*</sup>**

<sup>1</sup>College of Environment, Zhejiang University of Technology, Hangzhou 310032,  
People's Republic of China

<sup>2</sup>Collaborative Innovation Center of Yangtze River Delta Region Green  
Pharmaceuticals, Zhejiang University of Technology, Hangzhou 310032, People's  
Republic of China

\*Corresponding author: Weiting Yu

E-mail: [weitingyu@zjut.edu.cn](mailto:weitingyu@zjut.edu.cn)

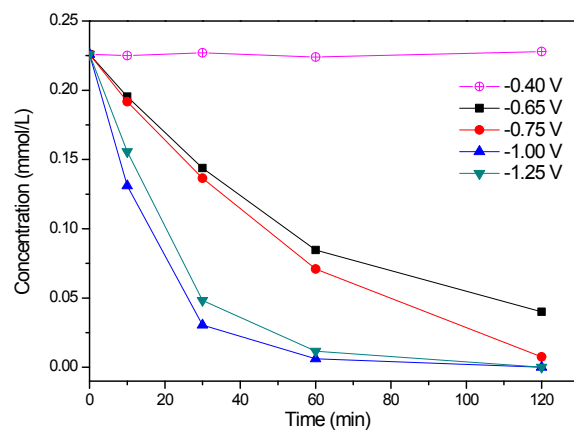

Figure S1. Time dependence of 2,4-D concentration at the applied potential of  $-0.40\text{ V}$ ,  $-0.65\text{ V}$ ,  $-0.75\text{ V}$ ,  $-1.00\text{ V}$  and  $-1.25\text{ V}$  on  $\text{Pd}_1\text{Cl}_{32}$ .

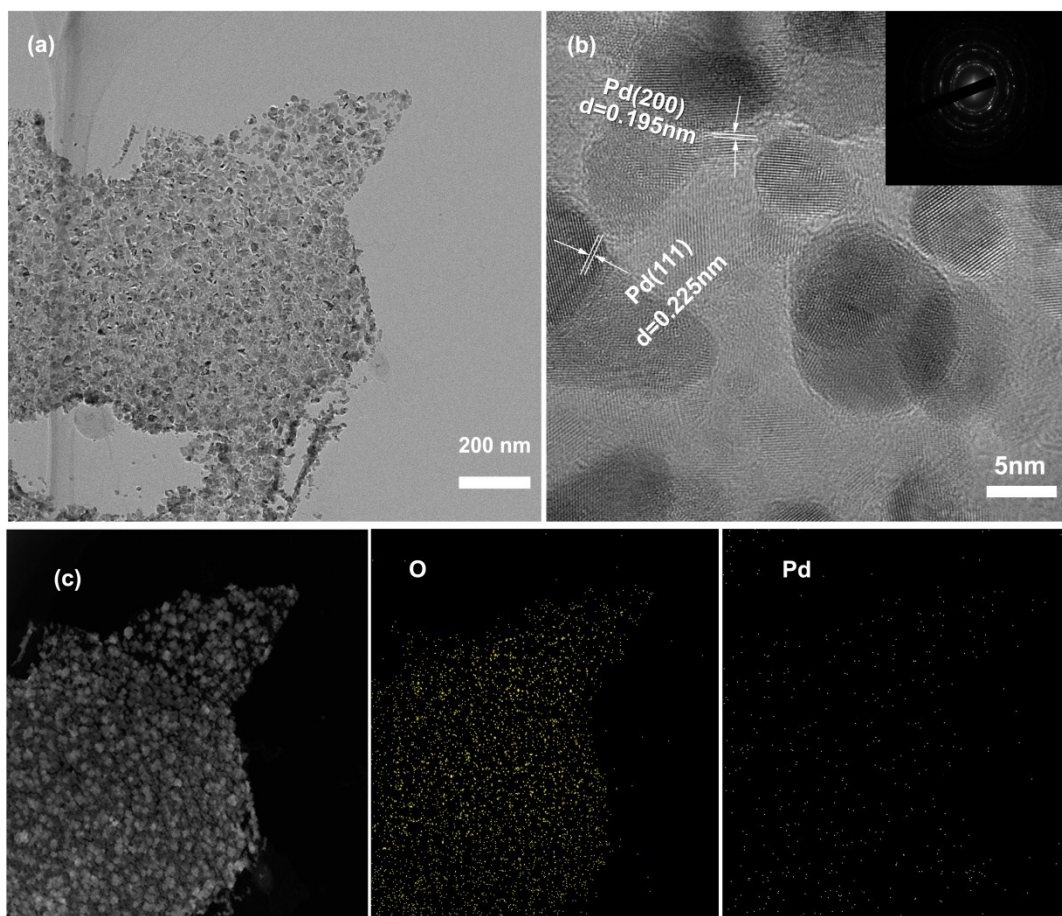

Figure S2. TEM images of  $\text{Pd}_1\text{HCl}_{32}$  (a) TEM (b) HRTEM and (c) Mapping of element.

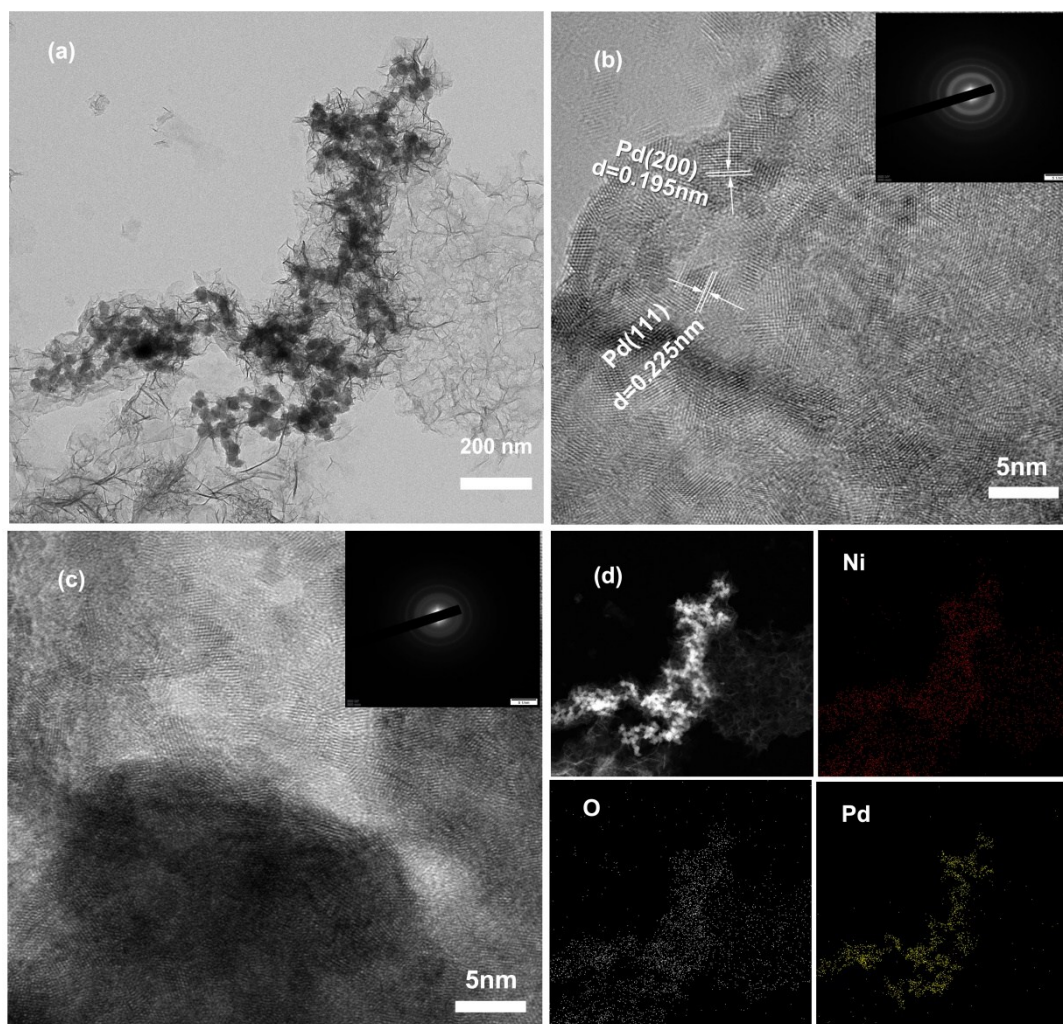

Figure S3. TEM images of  $\text{Pd}_1\text{Cl}_5$  (a) TEM, (b) HRTEM of Pd, (c) HRTEM of Ni and (d) Mapping of element.

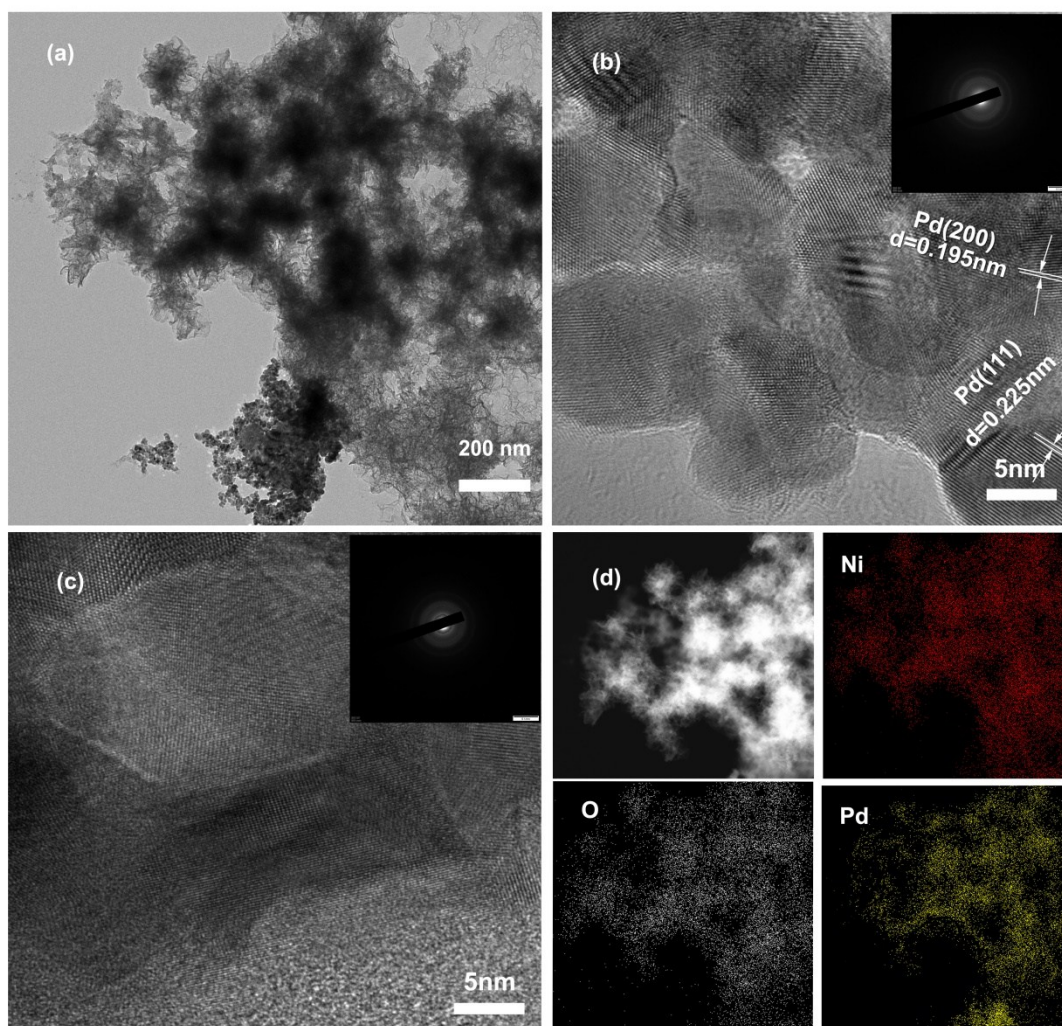

Figure S4. TEM images of  $\text{Pd}_1\text{Cl}_{302}$  (a) TEM, (b) HRTEM of Pd, (c) HRTEM of Ni and (d) Mapping of element.

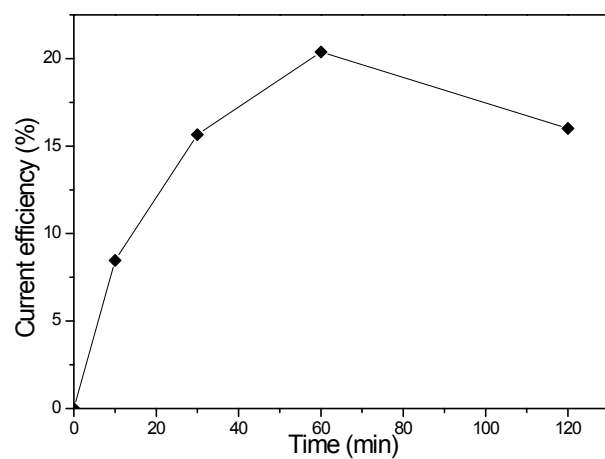

Figure S5. The trend of current efficiency with dechlorination time on  $\text{Pd}_1\text{Cl}_{32}$  at the applied potential of  $-0.65$  V.

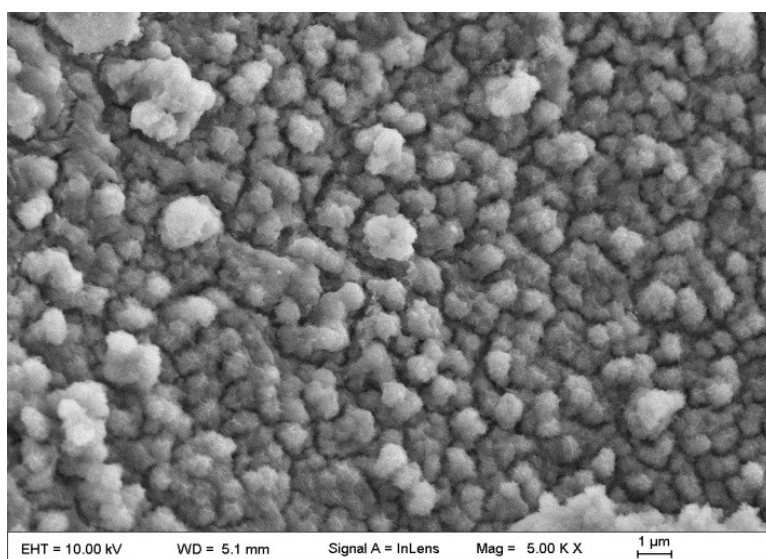

Figure S6. FE-SEM image of  $\text{Pd}_1\text{Cl}_{32}$  after 5 cycles of 2,4-D dechlorination.
